# Supplementary material for: Analysis of molecular subtypes and prognostic signature of senescence-associated secretory phenotype in pancreatic cancer
Source: PeerJ journal article supplement (doi:10.7717/peerj.20476), 2026-01-06
Supplement: Raw_data.zip [file colony formation.xlsx]

## Sheet: Sheet1
MIA PaCa-2						PANC-1
	PBS	rANGPTL4					PBS	rANGPTL4
1	117	343				1	59	130
2	50	198				2	40	77
3	137	326				3	34	108
