# Supplementary material for: Analysis of molecular subtypes and prognostic signature of senescence-associated secretory phenotype in pancreatic cancer
Source: PeerJ journal article supplement (doi:10.7717/peerj.20476), 2026-01-06
Supplement: Raw_data.zip [file Transwell.xlsx]

## Sheet: Migration
MIA PaCa-2	PBS	rANGPTL4
1	177	400
2	167	451
3	187	391
PANC-1	PBS	rANGPTL4
1	151	398
2	119	372
3	138	369
				1

## Sheet: Invasion
MIA PaCa-2	PBS	rANGPTL4
1	67	393
2	61	422
3	91	418
PANC-1	PBS	rANGPTL4
1	129	334
2	136	314
3	154	289
