# Supplementary figures and images for: Analysis of molecular subtypes and prognostic signature of senescence-associated secretory phenotype in pancreatic cancer
Source: PeerJ journal article supplement (doi:10.7717/peerj.20476), 2026-01-06

# MIA PaCa-2

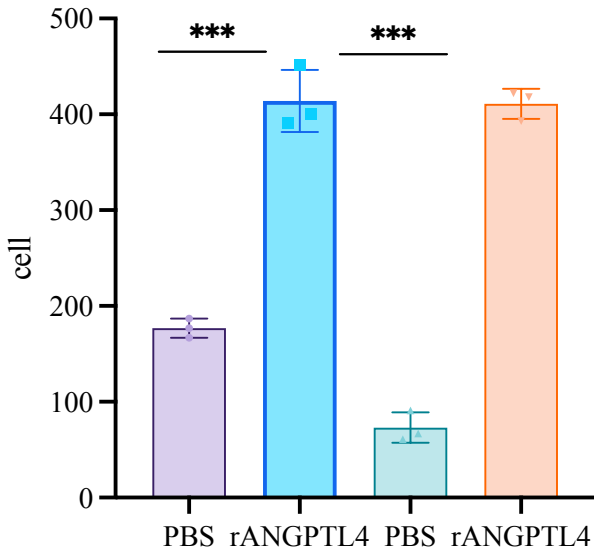

Supplement: Raw_data.zip [file MIA-Migration.pdf › Raw data/MIA-Migration.pdf]

# PANC-1

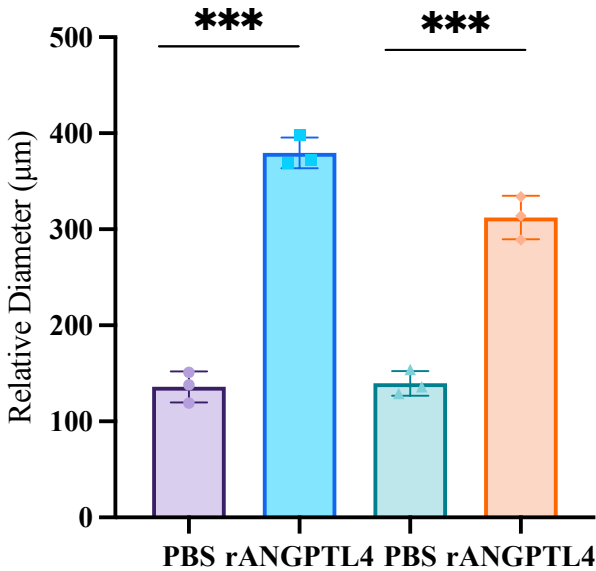

Supplement: Raw_data.zip [file PANC-Migration.pdf › Raw data/PANC-Migration.pdf]

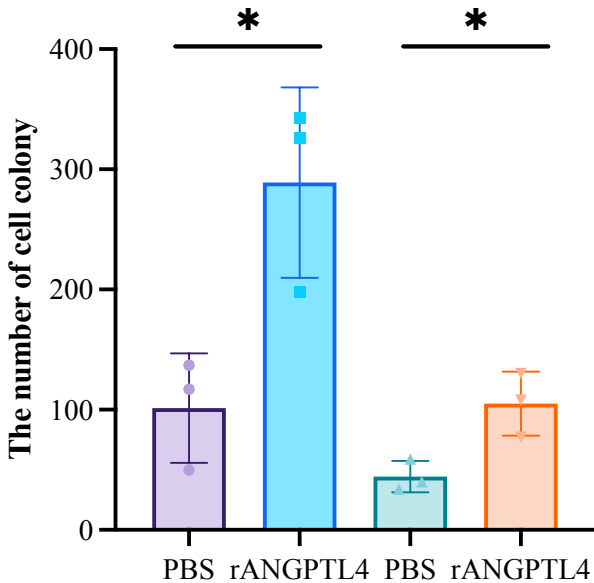

Supplement: Raw_data.zip [file colony formation.pdf › Raw data/colony formation.pdf]
